# Supplementary material
Source: Springer Nature journal article supplement (https://www.springermedizin.de/resource/supplementary/12936_2004_90_MOESM1_ESM.pdf/9546844)

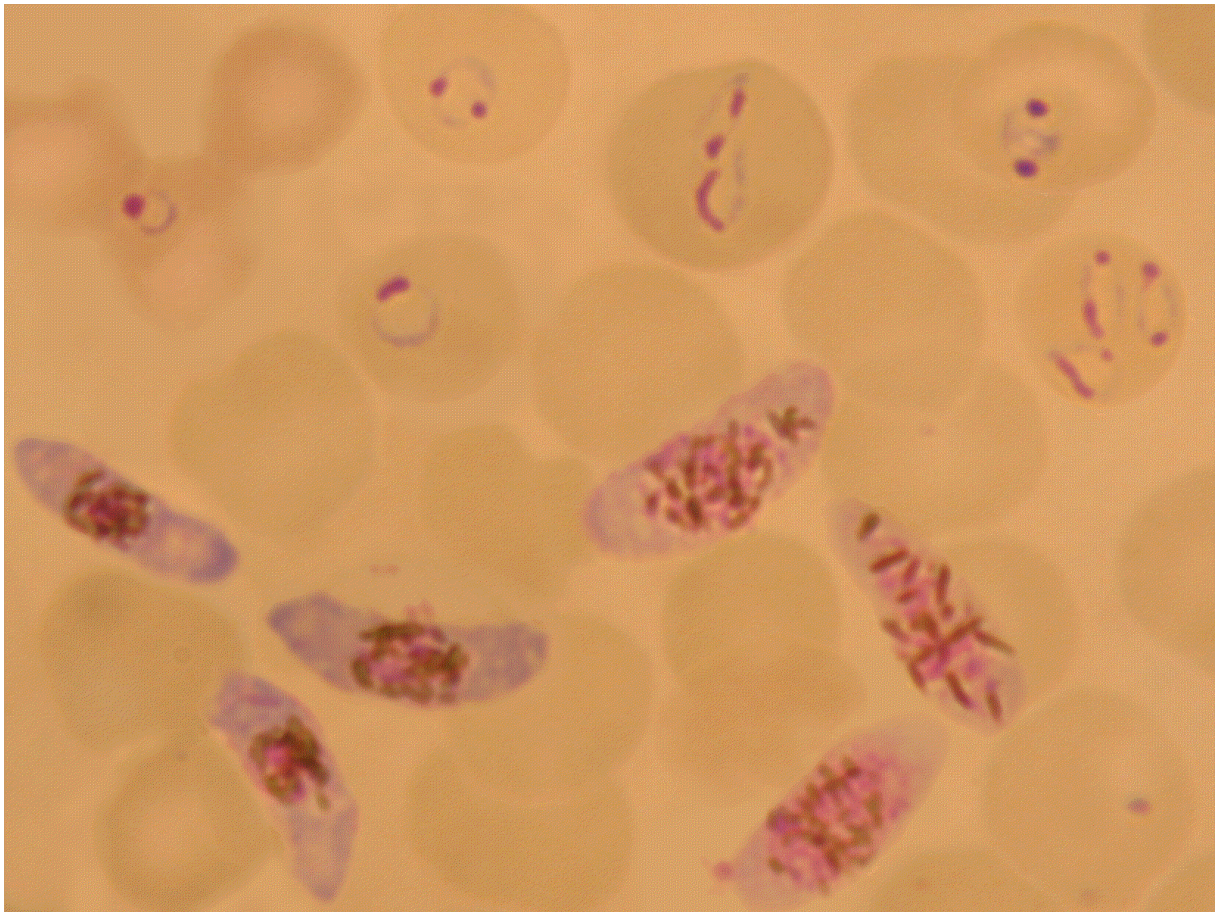

F

M

T

Supplement: MOESM1 [file 9546844]
